# Supplementary material
Source: PubMed Central journal article supplement (PMC6372042)
Supplement: cji-40-302-s001.pdf [file cji-40-302-s001.pdf]

## Supplemental Figure 1.

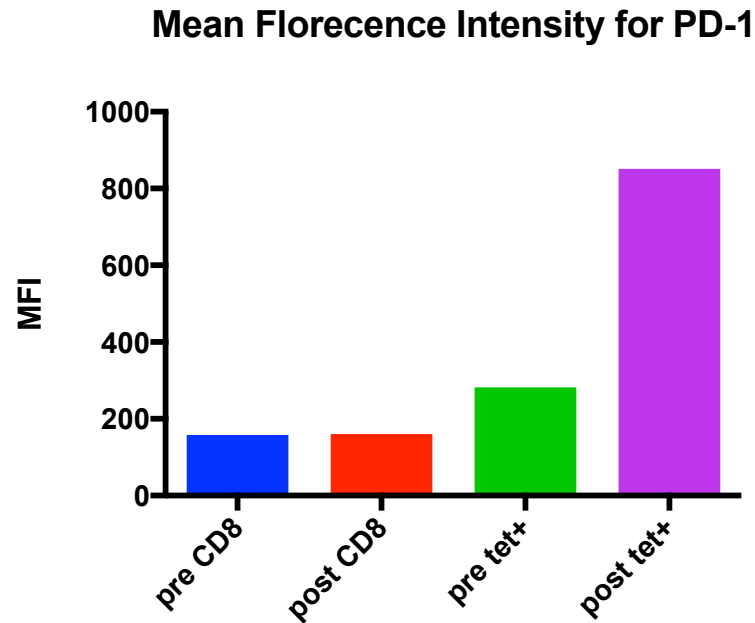

PD-1 staining was performed on PBMC stained with NY-ESO-1 tetramer and anti-CD8 antibody. Mean florescent intensity (MFI) PD-1 staining is shown for pre and post treatment PBMC as a whole as well as gated on CD8+, tet+ cells.

Supplemental Figure 2.

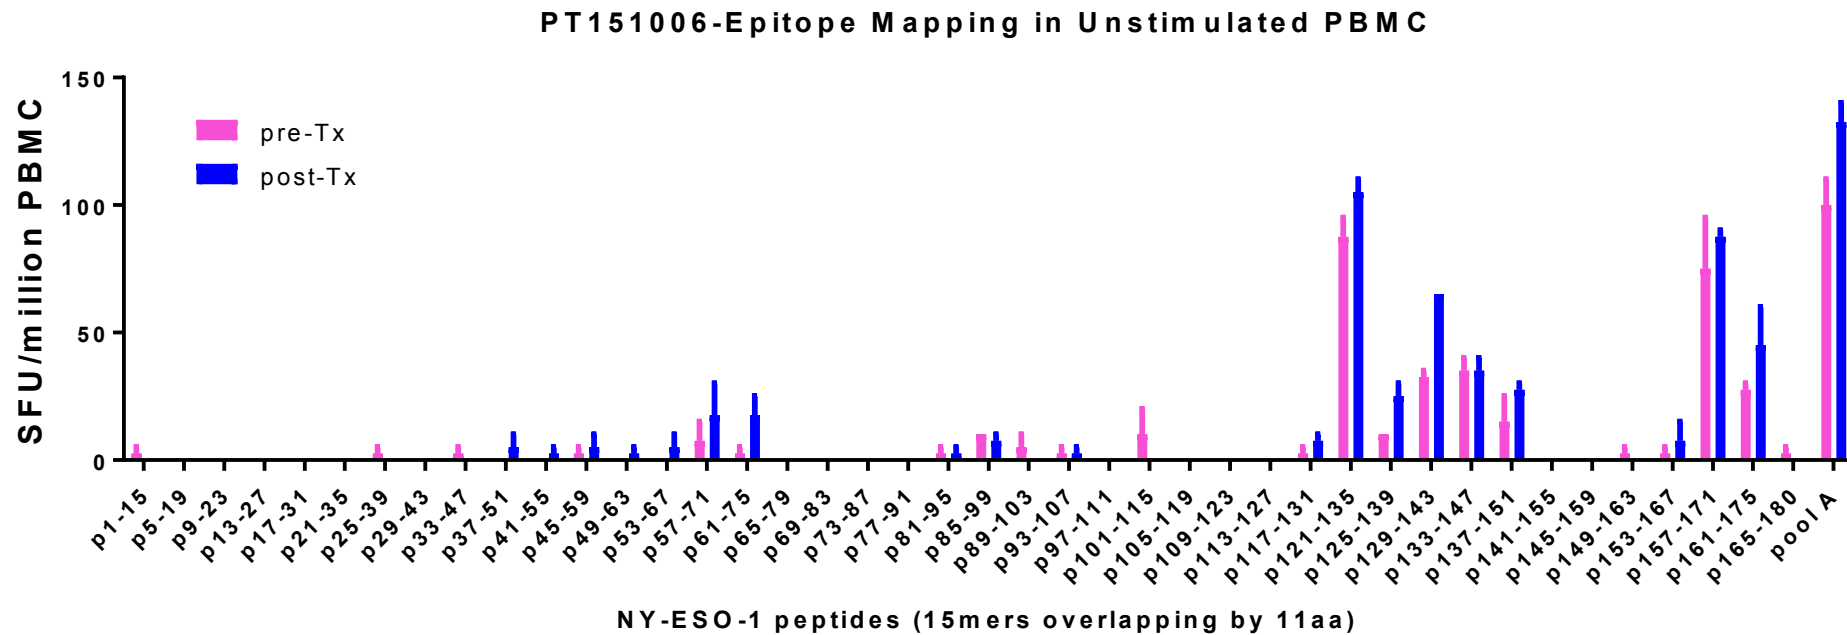

Pre (pink) and post (blue) treatment PBMC samples were tested for interferon gamma release using a peptide panel of 15mers overlapping by 11 amino acids encoding for regions of the NY-ESO-1 protein. Epitope mapping showing increased NY-ESO-1 specific responses following treatment with LV305.
